# Supplementary material for: Consistent Major Differences in Sex- and Age-Specific Diagnostic Performance among Nine Faecal Immunochemical Tests Used for Colorectal Cancer Screening
Source: MDPI journal article supplement (doi:10.3390/cancers13143574), 2021-07-16
Supplement: s1 [file s1]

# Supplementary Materials: Consistent Major Differences in Sex- and Age-Specific Diagnostic Performance among Nine Faecal Immunochemical Tests Used for Colorectal Cancer Screening

Anton Gies, Tobias Niedermaier, Elizabeth Alwers, Thomas Hielscher, Korbinian Weigl, Thomas Heisser, Petra Schrotz-King, Michael Hoffmeister and Hermann Brenner

Table S1. Test characteristics.

| FIT brand         | Manufacturer<br>(City, Country)            | Stool sample collection tube (fecal<br>mass/buffer volume) | Analyzer                                  | Quantitative analytical<br>range<br>[µg Hb/g feces] | Positivity threshold [µg Hb/g feces] |                      |                       |
|-------------------|--------------------------------------------|------------------------------------------------------------|-------------------------------------------|-----------------------------------------------------|--------------------------------------|----------------------|-----------------------|
|                   |                                            |                                                            |                                           |                                                     | Original                             | At 96.7% specificity | At 93.0% specificity* |
| IDK Hb ELISA      | Immundiagnostik<br>(Bensheim, Germany)     | IDK Extract<br>(15 mg/1.5 mL)                              | ELISA reader                              | 0.09 to 50.0                                        | 2.0                                  | 15.32                | 4.8                   |
| QuantOn Hem       | Immundiagnostik<br>(Bensheim, Germany)     | QuantOn Hem TUBE<br>(15 mg/1.5 mL)                         | QuantOn Hem test cassette +<br>Smartphone | 0.3 to 100.0                                        | 3.7                                  | 17.73                | 9.59                  |
| immoCARE-C        | CARE diagnostica<br>(Möllersdorf, Austria) | Sample Collection Tube<br>(20 mg/2.5 mL)                   | immoCARE-C test cassette +<br>CAREcube    | 3.75 to 250.0                                       | 6.25                                 | 17.3                 | 9.2                   |
| CAREprime         | Alfresa Pharma<br>(Osaka, Japan)           | Specimen Collection Container A<br>(9.5 mg/1.9 mL)         | CAREprime                                 | 1.6 to 240.0                                        | 6.3                                  | 12.35                | 6.65                  |
| RIDASCREEN Hb     | R-Biopharm<br>(Darmstadt, Germany)         | RIDA TUBE Haemoglobin<br>(10 mg/2.5 mL)                    | ELISA reader                              | 0.65 to 50.0                                        | 8.0                                  | 29.54                | 12.27                 |
| Eurolyser<br>test | FOB<br>Eurolyser Diagnostica               | Eurolyser FOB Sample Collector<br>(19.9 mg/1.6 mL)         | Eurolyser CUBE                            | 2.01 to 80.4                                        | 8.04                                 | 6.11                 | 2.01                  |

|                      |    |                                        |                                                  |                       |               |      |       |     |
|----------------------|----|----------------------------------------|--------------------------------------------------|-----------------------|---------------|------|-------|-----|
|                      |    | (Salzburg, Austria)                    |                                                  |                       |               |      |       |     |
| OC-Sensor            |    | Eiken Chemical<br>(Tokyo, Japan)       | OC Auto-Sampling Bottle 3<br>(10 mg/2.0 mL)      | OC-Sensor io          | 10.0 to 200.0 | 10.0 | 6.6   | 3.6 |
| QuikRead<br>iFOBT    | go | Orion Diagnostica<br>(Espoo, Finland)  | QuikRead go iFOBT Sampling Set<br>(10 mg/2.0 mL) | QuikRead go           | 15.0 to 200.0 | 15.0 | 15.0  | -   |
| SENTiFIT-FOB<br>Gold |    | Sentinel Diagnostics<br>(Milan, Italy) | SENTiFIT pierceTube<br>(10 mg/1.7 mL)            | SENTiFIT 270 analyzer | 1.7 to 129.88 | 17.0 | 17.68 | 1.7 |

Abbreviations: ELISA=Enzyme-linked immunosorbent assay; FIT, Fecal immunochemical test; Hb, Haemoglobin

\* For QuikRead go iFOBT it was not possible to set the threshold below 15µg/g to yield 93% specificity; For SENTiFIT-FOB Gold it was only possible to set a specificity of 93.3% at the lowest possible threshold value of 1.7 µg/g.

**Table S2** Partial area under the curve [% (95% CI)] for detection of advanced neoplasms by sex and by age

| FIT brand          | Sex              |                  |      | Age              |                  |      |
|--------------------|------------------|------------------|------|------------------|------------------|------|
|                    | Female           | Male             | p    | 50-64 years      | 65-79 years      | p    |
| IDK Hb ELISA       | 65.4 (59.4-72.2) | 63.8 (58.8-69.4) | 0.70 | 66.0 (60.7-72.5) | 63.9 (58.6-69.8) | 0.60 |
| QuantOn Hem        | 61.9 (56.4-68.6) | 63.5 (58.2-69.0) | 0.70 | 63.8 (58.6-69.6) | 63.8 (58.3-70.0) | 1.00 |
| immoCARE-C         | 65.9 (59.8-72.5) | 63.8 (58.8-69.7) | 0.62 | 65.9 (60.4-71.7) | 64.7 (59.3-71.3) | 0.78 |
| CAREprime          | 64.1 (58.5-70.5) | 62.7 (58.2-67.9) | 0.72 | 63.6 (58.5-69.2) | 64.1 (58.7-69.9) | 0.90 |
| RIDASCREEN Hb      | 65.8 (59.8-72.5) | 63.4 (58.2-69.3) | 0.58 | 66.5 (61.0-72.7) | 63.8 (58.4-70.1) | 0.54 |
| Eurolyser FOB test | 60.9 (55.8-66.4) | 62.4 (58.0-67.3) | 0.66 | 62.2 (57.5-67.1) | 63.6 (58.8-68.6) | 0.70 |
| OC-Sensor          | 63.5 (57.5-69.8) | 62.7 (57.9-67.9) | 0.84 | 63.8 (58.7-68.9) | 63.4 (57.9-69.5) | 0.94 |
| QuikRead go iFOBT  | 56.9 (52.9-61.2) | 60.0 (56.4-64.0) | 0.30 | 59.4 (55.3-63.5) | 59.4 (55.5-63.7) | 0.98 |
| SENTiFIT-FOB Gold  | 60.5 (55.6-65.6) | 61.4 (57.2-66.1) | 0.79 | 60.3 (56.1-65.0) | 64.1 (59.3-69.0) | 0.28 |

Abbreviations: CI, Confidence interval; FIT, Faecal immunochemical test; Hb, Haemoglobin
